# Supplementary material
Source: MDPI journal article supplement (https://www.mdpi.com/2073-4441/12/2/449)
Supplement: s1 [file s1]

## Supplementary Information

**Table S1** Range of environmental factors of the sampled springs (n=71). Species richness = number of found diatom species per sampling site, elevation [m], cond = conductivity [ $\mu\text{S}/\text{cm}$ ], temp = temperature [ $^{\circ}\text{C}$ ], flow = flow-velocity and shading conditions in a five-point scale according to Cantonati et al. (2007), N =  $\text{NO}_3^{-\text{H}}$  [mg/l], Cl =  $\text{Cl}^{-}$  [mg/l]. \* = measurement below threshold.

|         | Species | Elevation | Cond | Shading | pH   | Flow | Temp | N    | Cl    |
|---------|---------|-----------|------|---------|------|------|------|------|-------|
| Minimum | 5       | 520       | 13   | 1       | 6.22 | 1    | 3.5  | 0*   | 0.165 |
| Maximum | 138     | 2527      | 724  | 5       | 8.24 | 5    | 21.7 | 35.2 | 13.3  |
| Mean    | 66.9    | 1495      | 312  | 2.7     | 7.4  | 2.5  | 10.0 | 3.4  | 2.5   |

**Table S2** Sampled microhabitats in 66 near natural springs in Switzerland and their definition.

| Microhabitat                       | Definition                                                                                     | Sampling                                                                           |
|------------------------------------|------------------------------------------------------------------------------------------------|------------------------------------------------------------------------------------|
| Stone                              | Stones or gravel ( $\varnothing < 2\text{cm}$ ) on the spring ground.<br>Permanently submerged | 4 cm <sup>2</sup> from 5-10 stones, or 10-15 small stones if gravel was available. |
| Sediment                           | First millimetre of permanently submerged sediment within the spring.                          | 10 – 20 cm <sup>3</sup> of the top sediment layer                                  |
| Bryophytes                         | Bryophytes either submerged or not permanently submerged at the springs periphery              | 30 – 40 cm <sup>3</sup> of the bryophytes                                          |
| Leaf litter                        | Submerged leaf litter from the ground of the spring. Only old leaves have been sampled.        | 30 – 40 cm <sup>3</sup> of leaves                                                  |
| Epiphytic, filamentous green algae | Filamentous green algae submerged or not permanently submerged at the spring's periphery.      | 30 – 40 cm <sup>3</sup> of filamentous green algae                                 |
